# Supplementary figures and images for: Quantitative analysis of the oxidative DNA lesion, 2,2-diamino-4-(2-deoxy-β-d-erythro-pentofuranosyl)amino]-5(2H)-oxazolone (oxazolone), in vitro and in vivo by isotope dilution-capillary HPLC-ESI-MS/MS
Source: PubMed Central journal article supplement — Nucleic Acids Res. 2006 Oct 4;34(19):5449–60. doi: 10.1093/nar/gkl596 (PMC1636462; doi:10.1093/nar/gkl596), 2006-10-04

Supplement S-1. Separation of 8-oxo-dG from dG during HPLC-MS/MS analyses

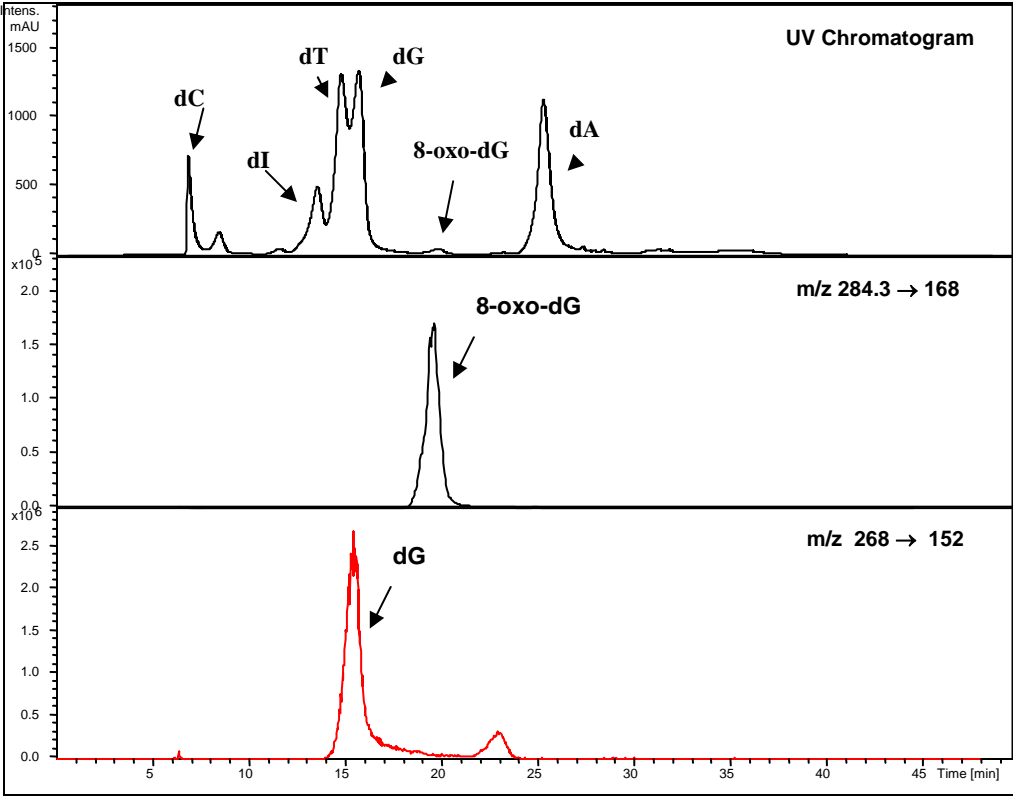

Supplement: nar_gkl596_1.pdf [file nar_gkl596_1.pdf]
